# Supplementary material for: Understanding thermoelectric properties from high-throughput calculations: trends, insights, and comparisons with experiment
Source: Royal Society of Chemistry journal article supplement (doi:10.1039/c5tc04339e), 2016-01-01
Supplement: c5tc04339e2.xlsx [file c5tc04339e2.xlsx]

## Sheet: Sheet1
Materials Project id	Formula	Cluster #	Cluster label
mp-932	ScGa3	5	lowest ZT
mp-568655	In7Pd3	5	lowest ZT
mp-31348	Sc2In	5	lowest ZT
mp-22646	InPd2	5	lowest ZT
mp-22146	In3Pd5	5	lowest ZT
mp-21301	ScInNi2	5	lowest ZT
mp-21067	ScInCu2	5	lowest ZT
mp-20539	ScIn3	5	lowest ZT
mp-19713	Sc3In	5	lowest ZT
mp-1869	GaPd2	5	lowest ZT
mp-16852	Ga7Ni3	5	lowest ZT
mp-13416	Sc2InNi2	5	lowest ZT
mp-13240	ScInCu4	5	lowest ZT
mp-11879	BaNiSn3	5	lowest ZT
mp-11412	ScGa2	5	lowest ZT
mp-11411	ScGa	5	lowest ZT
mp-11401	ScGa2Ni	5	lowest ZT
mp-11400	ScGaNi2	5	lowest ZT
mp-11360	ScGaCu2	5	lowest ZT
mp-9720	Rb3BP2	4	highest ZT
mp-9718	Rb3BAs2	4	highest ZT
mp-9675	Cs3BP2	4	highest ZT
mp-9664	K3BP2	4	highest ZT
mp-936	Hg4Pt	4	highest ZT
mp-9272	TlPt2S3	4	highest ZT
mp-9047	RbBS3	4	highest ZT
mp-8947	Sr(BS2)2	4	highest ZT
mp-8946	TlBS2	4	highest ZT
mp-866301	BaBSbS4	4	highest ZT
mp-8623	K2Te2Pt	4	highest ZT
mp-8622	Rb2PtSe2	4	highest ZT
mp-8621	K2PtSe2	4	highest ZT
mp-8507	Sr(P3Pt2)2	4	highest ZT
mp-7929	Rb2PtS2	4	highest ZT
mp-7928	K2PtS2	4	highest ZT
mp-762	PtS2	4	highest ZT
mp-730	P2Pt	4	highest ZT
mp-573658	Cs3BAs2	4	highest ZT
mp-573358	CsBSe3	4	highest ZT
mp-573316	CsPt2Se3	4	highest ZT
mp-570823	Ba(BSe3)2	4	highest ZT
mp-5614	Li3BS3	4	highest ZT
mp-559238	CsLi2BS3	4	highest ZT
mp-558219	SrLi(BS2)3	4	highest ZT
mp-557892	BaLi(BS2)3	4	highest ZT
mp-554076	BaLiBS3	4	highest ZT
mp-541487	TlPt2Se3	4	highest ZT
mp-5004	Na2B2Se7	4	highest ZT
mp-4351	K2B2S7	4	highest ZT
mp-4030	Rb2Pt3S4	4	highest ZT
mp-31060	Rb4(BS)9	4	highest ZT
mp-30533	KPt2S3	4	highest ZT
mp-30239	Sr3(BS3)2	4	highest ZT
mp-30222	Cs3BS3	4	highest ZT
mp-29977	Rb3BS3	4	highest ZT
mp-29975	K3BS3	4	highest ZT
mp-29337	Tl3BS3	4	highest ZT
mp-28987	NaPt2Se3	4	highest ZT
mp-28805	Tl2Pt5S6	4	highest ZT
mp-288	PtS	4	highest ZT
mp-28490	Tl3BSe3	4	highest ZT
mp-28373	BaP3Pt2	4	highest ZT
mp-28339	CaPPt	4	highest ZT
mp-27724	BPS4	4	highest ZT
mp-21236	BaPPt	4	highest ZT
mp-17823	Tl3B3S10	4	highest ZT
mp-15013	RbBS2	4	highest ZT
mp-15012	KBS2	4	highest ZT
mp-14797	RbPt2Se3	4	highest ZT
mp-14796	KPt2Se3	4	highest ZT
mp-14588	Na2PtSe2	4	highest ZT
mp-13445	Rb2As2Pt	4	highest ZT
mp-10246	Na2PtS2	4	highest ZT
mp-9915	LiBeP	3	very ionic
mp-9726	SrBeF4	3	very ionic
mp-9113	CsBeAsO4	3	very ionic
mp-8075	NaBe4SbO7	3	very ionic
mp-757917	Be(GaO2)2	3	very ionic
mp-755752	Rb2Be2O3	3	very ionic
mp-755292	Cs2BeO2	3	very ionic
mp-754604	BaBePO4F	3	very ionic
mp-7385	K2Be2PbF8	3	very ionic
mp-7324	KBePO4	3	very ionic
mp-696736	RbBe2F5	3	very ionic
mp-6772	CaBe2(PO4)2	3	very ionic
mp-6253	KLiBeF4	3	very ionic
mp-570886	BeI2	3	very ionic
mp-561543	BeF2	3	very ionic
mp-560894	Li4Be3P3ClO12	3	very ionic
mp-560431	KBe(PO3)3	3	very ionic
mp-554560	Li4Be3P3BrO12	3	very ionic
mp-5185	K2BeF4	3	very ionic
mp-5046	BeSO4	3	very ionic
mp-4622	Li2BeF4	3	very ionic
mp-3733	BeTl2F4	3	very ionic
mp-3318	Na2BeF4	3	very ionic
mp-30139	BeBr2	3	very ionic
mp-3009	Rb2BeF4	3	very ionic
mp-29463	LiBeN	3	very ionic
mp-28588	Na2BeO2	3	very ionic
mp-28559	Na6Be8O11	3	very ionic
mp-28158	K4Be3O5	3	very ionic
mp-27915	K2BeO2	3	very ionic
mp-27791	SrBe3O4	3	very ionic
mp-27608	Be4TeO7	3	very ionic
mp-27588	Be(PO3)2	3	very ionic
mp-27192	CsBe2F5	3	very ionic
mp-27187	Be2TlF5	3	very ionic
mp-2542	BeO	3	very ionic
mp-23267	BeCl2	3	very ionic
mp-18704	CsLiBeF4	3	very ionic
mp-18509	KBe3ZnF9	3	very ionic
mp-18337	Be3N2	3	very ionic
mp-17313	Mg3BeAl8O16	3	very ionic
mp-17229	RbBe3ZnF9	3	very ionic
mp-15395	CsBePO4	3	very ionic
mp-14324	K2Na4Be2O5	3	very ionic
mp-13630	Rb3NaBe2F8	3	very ionic
mp-12431	BaBeF4	3	very ionic
mp-12262	CsBeF3	3	very ionic
mp-12240	Na2LiBe2F7	3	very ionic
mp-11919	Sr(BeN)2	3	very ionic
mp-11918	Ca(BeN)2	3	very ionic
mp-11917	Mg(BeN)2	3	very ionic
mp-9812	ZnCO3	2	carbonates
mp-9610	Li2CN2	2	carbonates
mp-9166	MgCN2	2	carbonates
mp-867757	RbCaCO3F	2	carbonates
mp-867261	RbSrCO3F	2	carbonates
mp-866617	Cs2Sr2(CO3)3	2	carbonates
mp-865427	KSrCO3F	2	carbonates
mp-8127	K2Mg(CO3)2	2	carbonates
mp-777027	Na6Ni2C4SO16	2	carbonates
mp-777027	Na6Ni2C4SO16	2	carbonates
mp-772808	K2BiPCO7	2	carbonates
mp-772763	K2ScPCO7	2	carbonates
mp-771547	Na3NiAsCO7	2	carbonates
mp-771547	Na3NiAsCO7	2	carbonates
mp-771032	Na2CuAsCO7	2	carbonates
mp-770968	Na3NiPCO7	2	carbonates
mp-770968	Na3NiPCO7	2	carbonates
mp-770033	K3NiPCO7	2	carbonates
mp-770033	K3NiPCO7	2	carbonates
mp-768663	Na3SiBiCO7	2	carbonates
mp-768154	Na3MgPCO7	2	carbonates
mp-768146	Na2AlPCO7	2	carbonates
mp-768144	Na2SbPCO7	2	carbonates
mp-768140	Na2BiPCO7	2	carbonates
mp-768120	Na2GaPCO7	2	carbonates
mp-767552	Na3CaPCO7	2	carbonates
mp-767545	Na3ZnPCO7	2	carbonates
mp-767534	Na2CuPCO7	2	carbonates
mp-767521	Na2InPCO7	2	carbonates
mp-767518	Na2ScPCO7	2	carbonates
mp-767430	Na3CdPCO7	2	carbonates
mp-756981	K2SbPCO7	2	carbonates
mp-756968	K3CaPCO7	2	carbonates
mp-756769	Na2TlPCO7	2	carbonates
mp-753353	Sr4LiCu(CO5)2	2	carbonates
mp-6892	Na6Mg2C4SO16	2	carbonates
mp-6867	KCaCO3F	2	carbonates
mp-6841	Ba4NaCu(CO5)2	2	carbonates
mp-6633	NaCSN	2	carbonates
mp-649453	Ca3BCNCl2	2	carbonates
mp-6494	K2Ca(CO3)2	2	carbonates
mp-646116	Na3MgC2BrO6	2	carbonates
mp-6459	CaMg(CO3)2	2	carbonates
mp-616577	Sr3BCNCl2	2	carbonates
mp-6026	Na2Mg(CO3)2	2	carbonates
mp-571324	CNCl	2	carbonates
mp-570443	Tl2CN2	2	carbonates
mp-570248	NaC2N3	2	carbonates
mp-569782	Sr2LiCBr3N2	2	carbonates
mp-567655	Sr2C(NCl)2	2	carbonates
mp-567601	Sr4CN4	2	carbonates
mp-562137	KLiCO3	2	carbonates
mp-560519	Ba3ScCO3F7	2	carbonates
mp-559533	NaLiCO3	2	carbonates
mp-558539	Cs2Ba2(CO3)3	2	carbonates
mp-557391	Na2Ca2(CO3)3	2	carbonates
mp-556783	NaLiCO3	2	carbonates
mp-556210	Bi2CO5	2	carbonates
mp-555901	KCuCO3F	2	carbonates
mp-555866	K6Be4C6O19	2	carbonates
mp-555512	RbCO2	2	carbonates
mp-555467	Sr2AlCO3F5	2	carbonates
mp-555131	CsCO2	2	carbonates
mp-5504	BaCO3	2	carbonates
mp-543045	Tl2CO3	2	carbonates
mp-542332	K2Cu(CO3)2	2	carbonates
mp-541989	Na2CN2	2	carbonates
mp-541966	KAgCO3	2	carbonates
mp-5348	MgCO3	2	carbonates
mp-5251	Ca4CN4	2	carbonates
mp-505702	Pb2CO4	2	carbonates
mp-504593	Pb2CCl2O3	2	carbonates
mp-4691	Ag2CO3	2	carbonates
mp-4385	CdCO3	2	carbonates
mp-4138	Rb2CO3	2	carbonates
mp-4124	CaCN2	2	carbonates
mp-39823	Na8Al6Si6CO27	2	carbonates
mp-3963	K2CO3	2	carbonates
mp-3953	CaCO3	2	carbonates
mp-3822	SrCO3	2	carbonates
mp-31302	KCO3	2	carbonates
mp-31271	RbCO3	2	carbonates
mp-3070	Na2CO3	2	carbonates
mp-3054	Li2CO3	2	carbonates
mp-30161	Si2CN4	2	carbonates
mp-29826	ZnCN2	2	carbonates
mp-28898	BaCN2	2	carbonates
mp-28160	Ca3C3Cl2	2	carbonates
mp-27727	CCl2O	2	carbonates
mp-23653	Na3MgC2ClO6	2	carbonates
mp-20066	CO2	2	carbonates
mp-19893	PbCO3	2	carbonates
mp-19727	PbCN2	2	carbonates
mp-19147	NiCO3	2	carbonates
mp-19147	NiCO3	2	carbonates
mp-15703	BeCN2	2	carbonates
mp-15472	Ba4LiCu(CO5)2	2	carbonates
mp-14734	CsCOF3	2	carbonates
mp-13703	Al4CO4	2	carbonates
mp-12317	SrCN2	2	carbonates
mp-1167	CF4	2	carbonates
mp-11166	BaZnCO3F2	2	carbonates
mp-10969	CdCN2	2	carbonates
mp-10408	K2CN2	2	carbonates
mp-9844	BaAl2B2O7	1	borates
mp-984	BN	1	borates
mp-9793	Ba3BAsO3	1	borates
mp-9784	BaBAsO5	1	borates
mp-9749	Sr(BO2)2	1	borates
mp-9747	B4PbO7	1	borates
mp-9723	Sr4Li(BN2)3	1	borates
mp-9712	Ba3BPO3	1	borates
mp-9705	Ba4Na(BN2)3	1	borates
mp-9702	Sr3BPO3	1	borates
mp-9262	Cs2PtF6	1	borates
mp-9259	Ba2Mg(BO3)2	1	borates
mp-8943	PtF4	1	borates
mp-8873	LiGeBO4	1	borates
mp-8872	RbNa2BO3	1	borates
mp-8871	CsNa2BO3	1	borates
mp-8796	Sr2LiSc(B2O5)2	1	borates
mp-8727	Ba4PtO6	1	borates
mp-8710	Ca2Pt3O8	1	borates
mp-8697	ScBO3	1	borates
mp-867673	Na3(Pt3O4)4	1	borates
mp-866613	CsNa2Be6(BO3)5	1	borates
mp-866313	Ba3In(BO3)3	1	borates
mp-8610	Li8PtO6	1	borates
mp-8586	InBF4	1	borates
mp-8547	PdPtF6	1	borates
mp-8376	MgAlBO4	1	borates
mp-8271	Ba2Ca(BO2)6	1	borates
mp-8263	KNa2BO3	1	borates
mp-8256	ZnPtF6	1	borates
mp-8255	CaPtF6	1	borates
mp-8212	Cd(PtO2)3	1	borates
mp-8208	Mg(PtO2)3	1	borates
mp-8207	Zn(PtO2)3	1	borates
mp-8192	Rb2PtF6	1	borates
mp-8056	Ca(BO2)2	1	borates
mp-8000	SrSn(BO3)2	1	borates
mp-780239	Na6Sn2B4SO16	1	borates
mp-778152	Sc2Pt2O7	1	borates
mp-772986	Na3SiSnBO7	1	borates
mp-771158	Ba2B2O5	1	borates
mp-768820	Li3Bi(BO3)2	1	borates
mp-766463	Na3GaB4O9	1	borates
mp-757840	Ba4(PtO3)3	1	borates
mp-756374	SrPt3O4	1	borates
mp-755465	Hg2Pt2O7	1	borates
mp-755417	Ba3(BO3)2	1	borates
mp-755116	In2Pt2O7	1	borates
mp-753552	Cu4PtO5	1	borates
mp-7323	RbBe2BO3F2	1	borates
mp-7210	Cd2B2O5	1	borates
mp-704915	Na2Ni2(B4O7)3	1	borates
mp-7027	InBO3	1	borates
mp-6870	KBe2BO3F2	1	borates
mp-680683	CsB9O14	1	borates
mp-680122	TlB5O8	1	borates
mp-6799	LiCa4(BN2)3	1	borates
mp-6787	RbLiB4O7	1	borates
mp-6775	Na3Sr(BO2)5	1	borates
mp-6738	Al6B5(O5F)3	1	borates
mp-6730	Sr3ZnPtO6	1	borates
mp-6660	BaNaBO3	1	borates
mp-6648	KLiB4O7	1	borates
mp-6632	Ca5B3O9F	1	borates
mp-6595	Sr3CuPtO6	1	borates
mp-6585	CaMgB2O5	1	borates
mp-6578	Ba3B(PO4)3	1	borates
mp-6499	BaLiBO3	1	borates
mp-6486	SrBPO5	1	borates
mp-6419	CaSi2(BO4)2	1	borates
mp-622018	BAs5(Pb3O10)2	1	borates
mp-6126	LiCdBO3	1	borates
mp-607931	Cs3NaLi2(BO3)2	1	borates
mp-6075	Ba2Li(BO2)5	1	borates
mp-6064	Sr3MgPtO6	1	borates
mp-6044	Sr6B(PO4)5	1	borates
mp-6040	BaBPO5	1	borates
mp-6032	SrSi2(BO4)2	1	borates
mp-5990	CsLi(B3O5)2	1	borates
mp-5858	CdPtF6	1	borates
mp-570530	Cs(BCl)6	1	borates
mp-569810	Sr2BIN2	1	borates
mp-565991	Ni5Sn(BO5)2	1	borates
mp-561725	CsBO2	1	borates
mp-561525	K2Ga2B2O7	1	borates
mp-561514	NaSrB5O9	1	borates
mp-561226	BTe3(OF5)3	1	borates
mp-561018	Na3Sc2(BO3)3	1	borates
mp-560870	BaGa2B2O7	1	borates
mp-560833	B3Pb6ClO10	1	borates
mp-560550	BaBi2(B2O5)2	1	borates
mp-560471	Zn2B2PbO6	1	borates
mp-560423	KBS4(ClO3)4	1	borates
mp-560373	Bi3Pt3O11	1	borates
mp-560217	K2Al2B2O7	1	borates
mp-560189	NaLi2BO3	1	borates
mp-560026	Mg5B3O9F	1	borates
mp-560010	Rb2Ga2B2O7	1	borates
mp-559783	Na3B(PO4)2	1	borates
mp-559759	CaAlBO4	1	borates
mp-559557	Cs2Na2B10O17	1	borates
mp-559284	Rb2Al2B2O7	1	borates
mp-559186	BaBiBO4	1	borates
mp-558838	NiPtF6	1	borates
mp-558838	NiPtF6	1	borates
mp-558804	CsGeB3O7	1	borates
mp-558753	BiB2O4F	1	borates
mp-558669	SrAl2B2O7	1	borates
mp-558628	KLi2BO3	1	borates
mp-558607	K3BSb4O13	1	borates
mp-558548	Na3B6NO13	1	borates
mp-558521	B2Se2O7	1	borates
mp-558491	BaAlBO3F2	1	borates
mp-558455	Na4Li5(BO3)3	1	borates
mp-558430	BaB2F8	1	borates
mp-558358	Ca(B3O5)2	1	borates
mp-558149	BF3	1	borates
mp-558137	AlBPbO4	1	borates
mp-558105	LiB6O9F	1	borates
mp-557856	BCl(OF2)2	1	borates
mp-557855	CaGaBO4	1	borates
mp-557836	Na5B2P3O13	1	borates
mp-557689	CaAl2B2O7	1	borates
mp-557632	K2LiBO3	1	borates
mp-557467	Li4Ca(BO3)2	1	borates
mp-557364	CdB2F8	1	borates
mp-557330	Sr2B5ClO9	1	borates
mp-557177	Li2Al(BO2)5	1	borates
mp-557104	LiAlB2O5	1	borates
mp-557103	B5Pb2ClO9	1	borates
mp-557012	Li3Sc(BO3)2	1	borates
mp-556801	Na3B6PO13	1	borates
mp-556695	NaSrBO3	1	borates
mp-556655	Li2AlBO4	1	borates
mp-556601	BiBPbO4	1	borates
mp-556548	Bi(BO2)3	1	borates
mp-556393	RbBe4(BO3)3	1	borates
mp-556331	Sr4Pt4PbO11	1	borates
mp-556330	Cs2Ga2B2O7	1	borates
mp-556250	KSrB5O9	1	borates
mp-556195	Na2AlB(As2O7)2	1	borates
mp-556046	SrGa2B2O7	1	borates
mp-5560	Cd3(BO3)2	1	borates
mp-555880	ZnBi2B2O7	1	borates
mp-555863	P4PtF12	1	borates
mp-555742	Ba2B5ClO9	1	borates
mp-555447	NaScB2O5	1	borates
mp-555387	BaSi2(BO4)2	1	borates
mp-555207	BN(OF2)2	1	borates
mp-555203	Sr5B3ClO9	1	borates
mp-555082	CsLi5(BO3)2	1	borates
mp-555070	BaBe2(BO3)2	1	borates
mp-555023	KCa4(BO3)3	1	borates
mp-554873	Ag2B8O13	1	borates
mp-554673	KZnB(PO4)2	1	borates
mp-554657	Na2Tl2B10O17	1	borates
mp-554542	Mg3B(OF)3	1	borates
mp-554346	KSr4(BO3)3	1	borates
mp-554263	Ca2BClO3	1	borates
mp-554259	SrAgB7O12	1	borates
mp-554056	Ca2B5BrO9	1	borates
mp-554053	SrGaBO4	1	borates
mp-554041	Na2Al2B2O7	1	borates
mp-554023	Be2BO3F	1	borates
mp-553930	B2Pb6SO12	1	borates
mp-553926	NaLiB4O7	1	borates
mp-553925	Rb5B19O31	1	borates
mp-549737	Ba2Ca(BO3)2	1	borates
mp-542931	Bi2B8O15	1	borates
mp-541341	PtF5	1	borates
mp-541269	GaNi2BO5	1	borates
mp-540838	Ni3B7IO13	1	borates
mp-540659	Ba(BO2)2	1	borates
mp-5401	Sr2B2O5	1	borates
mp-531826	Li2PtO3	1	borates
mp-531265	Ca3(BN2)2	1	borates
mp-5160	AgBF5	1	borates
mp-505743	GaBPbO4	1	borates
mp-505319	PtF6	1	borates
mp-5005	Mg3(BO3)2	1	borates
mp-5001	Li3BN2	1	borates
mp-4929	KBF4	1	borates
mp-4870	Cu(BO2)2	1	borates
mp-4812	Zn4B6O13	1	borates
mp-4779	Li2B4O7	1	borates
mp-4710	Hg3(BO3)2	1	borates
mp-4674	BNF8	1	borates
mp-4598	Sr4PtO6	1	borates
mp-4584	Tl3BO3	1	borates
mp-40373	In14Ga3Pt2O8F15	1	borates
mp-3977	CsB3O5	1	borates
mp-39215	Zn3GaB6PO12	1	borates
mp-3919	KBO2	1	borates
mp-3889	NaBO2	1	borates
mp-3859	Ca2B2O5	1	borates
mp-3821	K2PtF6	1	borates
mp-3635	LiBO2	1	borates
mp-3589	BPO4	1	borates
mp-3575	Ca3(BO3)2	1	borates
mp-35647	Zn2PtO4	1	borates
mp-3521	NaBF4	1	borates
mp-33940	Mg2PtO4	1	borates
mp-3281	Al5BO9	1	borates
mp-3277	BAsO4	1	borates
mp-31408	Al4(B2O5)3	1	borates
mp-31358	RbBO2	1	borates
mp-31250	BiBO3	1	borates
mp-31073	Na3B7O12	1	borates
mp-30975	Na3BO3	1	borates
mp-30905	Ba3(BN2)2	1	borates
mp-306	B2O3	1	borates
mp-30548	TlBF4	1	borates
mp-3032	RbBF4	1	borates
mp-30315	Ca3BN3	1	borates
mp-30091	MgB9N	1	borates
mp-30062	Cs2PtBr6	1	borates
mp-29787	Ba5Pt2O9	1	borates
mp-29282	P2PtO7	1	borates
mp-29216	Cs2PtCl4	1	borates
mp-29155	TlB3O5	1	borates
mp-28721	Pt(SCl4)2	1	borates
mp-28630	Na3BN2	1	borates
mp-28488	CuPtF6	1	borates
mp-28247	K2PtI6	1	borates
mp-28110	Rb2PtI6	1	borates
mp-27834	Tl2PtCl6	1	borates
mp-27692	BaB4O7	1	borates
mp-27691	K2PtBr6	1	borates
mp-27657	Ca2B6O11	1	borates
mp-27566	K3(PtO2)2	1	borates
mp-27564	Na4B2O5	1	borates
mp-27430	Sn2BF7	1	borates
mp-27349	BSF7	1	borates
mp-27275	Li3BO3	1	borates
mp-27245	BSBr	1	borates
mp-27184	B10(Pb2O7)3	1	borates
mp-23632	Ca2BN2Cl	1	borates
mp-23623	B5Pb2BrO9	1	borates
mp-23612	K3B6BrO10	1	borates
mp-23549	Bi3B5O12	1	borates
mp-23513	K2PtCl6	1	borates
mp-23406	Cs2PtCl6	1	borates
mp-23398	BClF6	1	borates
mp-23350	Rb2PtCl6	1	borates
mp-23341	Bi2Pt2O7	1	borates
mp-23290	PtCl2	1	borates
mp-23225	BBr3	1	borates
mp-23189	BI3	1	borates
mp-23184	BCl3	1	borates
mp-23131	Sr2BN2Cl	1	borates
mp-23060	Cs2PtI6	1	borates
mp-22934	K2PtCl4	1	borates
mp-22313	Na2PtO2	1	borates
mp-22186	In6Ge2PtO9	1	borates
mp-22048	Pt2PbO4	1	borates
mp-21266	BPPbO5	1	borates
mp-21084	In6Ga2PtO8	1	borates
mp-20458	PtPbF6	1	borates
mp-20285	NaPt3O4	1	borates
mp-19166	Sr3NiPtO6	1	borates
mp-19166	Sr3NiPtO6	1	borates
mp-18806	Ni3(BO3)2	1	borates
mp-18495	SrLi(B3O5)3	1	borates
mp-18256	Mg2B2O5	1	borates
mp-17941	Na2B4O7	1	borates
mp-17864	BaNa(B3O5)3	1	borates
mp-17672	BaLi(B3O5)3	1	borates
mp-17562	Sr3Sc(BO3)3	1	borates
mp-17166	K2B4O7	1	borates
mp-16980	Rb2B4O7	1	borates
mp-16828	Li3B7O12	1	borates
mp-16737	Na2BeB2O5	1	borates
mp-16585	HgB4O7	1	borates
mp-16432	Sr3(BO3)2	1	borates
mp-1604	Pt3O4	1	borates
mp-15840	BaBPO5	1	borates
mp-15541	KNa2Si12(BO10)3	1	borates
mp-14921	Zn4B6SeO12	1	borates
mp-14398	CaSn(BO3)2	1	borates
mp-13986	Li2PtF6	1	borates
mp-13801	Tl2Pt2O7	1	borates
mp-13603	CdB4O7	1	borates
mp-13541	Sr2Mg(BO3)2	1	borates
mp-1346	B6O	1	borates
mp-13252	SnB4O7	1	borates
mp-1285	PtO2	1	borates
mp-12403	LiBF4	1	borates
mp-12233	ZnB4O7	1	borates
mp-12183	KB5O8	1	borates
mp-11715	MgSn(BO3)2	1	borates
mp-10814	SrLiBO3	1	borates
mp-10811	NaSr4(BN2)3	1	borates
mp-10510	BaAlBO3F2	1	borates
mp-10509	BaGaBO3F2	1	borates
mp-10392	Sr3CdPtO6	1	borates
mp-10234	Sr2BN2F	1	borates
mp-10233	Ca2BN2F	1	borates
mp-9996	SiP2	0	most materials
mp-9986	CsAuO	0	most materials
mp-9934	BaMgSi	0	most materials
mp-9919	LiZnSb	0	most materials
mp-9918	LiGe	0	most materials
mp-9910	K2Pd3S4	0	most materials
mp-9900	Ag2GeS3	0	most materials
mp-9899	BaAgP	0	most materials
mp-9881	KAuSe	0	most materials
mp-988	Si3N4	0	most materials
mp-9846	RbCaSb	0	most materials
mp-9845	RbCaAs	0	most materials
mp-9843	Sr3(AlP2)2	0	most materials
mp-9827	RbHg2	0	most materials
mp-9821	RbSbF6	0	most materials
mp-9820	CsAsF6	0	most materials
mp-9819	RbAsF6	0	most materials
mp-9816	GeF4	0	most materials
mp-9814	Cu3SbSe4	0	most materials
mp-981	SrF2	0	most materials
mp-9798	Rb(SbSe2)2	0	most materials
mp-9789	CaPS3	0	most materials
mp-9788	SrPS3	0	most materials
mp-9783	Ba3(AsO4)2	0	most materials
mp-9782	KAg3Se2	0	most materials
mp-9781	K3SbS4	0	most materials
mp-978	Sr2Sn	0	most materials
mp-9778	K2AgP	0	most materials
mp-9775	NaSrAs	0	most materials
mp-9774	Ba4Sb2O	0	most materials
mp-9770	Ag8GeS6	0	most materials
mp-9768	BaSb2Pd	0	most materials
mp-9751	Al2Ge2O7	0	most materials
mp-9750	SbPO5	0	most materials
mp-9732	BaNaP	0	most materials
mp-9731	RbAuSe	0	most materials
mp-9722	Na2LiGaAs2	0	most materials
mp-9719	Na2LiAlP2	0	most materials
mp-9711	Ba2Si5N8	0	most materials
mp-9710	Sr2Si5N8	0	most materials
mp-971	K2O	0	most materials
mp-9703	K2LiGaAs2	0	most materials
mp-9698	Rb6AlSb3	0	most materials
mp-9697	Cs6GaSb3	0	most materials
mp-9693	K2SnSe3	0	most materials
mp-9692	K2GeSe3	0	most materials
mp-9690	Ca(AlGa)2	0	most materials
mp-9687	K2PAu	0	most materials
mp-9682	Na3AlSe3	0	most materials
mp-9680	Na3AlTe3	0	most materials
mp-9676	K2NaGaAs2	0	most materials
mp-9673	K2NiAs2	0	most materials
mp-9672	K2NiP2	0	most materials
mp-9657	LiAsO3	0	most materials
mp-9655	Na4SnO4	0	most materials
mp-9640	SrCu(SeO3)2	0	most materials
mp-9639	BaCu(SeO3)2	0	most materials
mp-9636	CsSbF6	0	most materials
mp-9634	Na3AgS2	0	most materials
mp-9631	AlAgO2	0	most materials
mp-9628	KCdF3	0	most materials
mp-9625	LiMgPO4	0	most materials
mp-96	S	0	most materials
mp-9588	LiP	0	most materials
mp-9583	K2ZnF4	0	most materials
mp-9578	Ba3(AlSi)2	0	most materials
mp-9576	KSbSe2	0	most materials
mp-9571	Ca(ZnAs)2	0	most materials
mp-9570	Ca(CdP)2	0	most materials
mp-9569	Ca(ZnP)2	0	most materials
mp-9567	Ba(MgSb)2	0	most materials
mp-9566	Sr(MgSb)2	0	most materials
mp-9565	Ca(MgSb)2	0	most materials
mp-9564	Ca(MgAs)2	0	most materials
mp-9563	Li2Sb	0	most materials
mp-9556	SrZnSi	0	most materials
mp-9535	Al6Cd4TeO12	0	most materials
mp-9511	K2AsAuS4	0	most materials
mp-9510	Tl2PAuS4	0	most materials
mp-9509	K2PAuS4	0	most materials
mp-9486	K2AlF5	0	most materials
mp-9473	Ba(NiP)2	0	most materials
mp-947	Au2S	0	most materials
mp-9468	KCa9Mg(PO4)7	0	most materials
mp-9467	NaCa9Mg(PO4)7	0	most materials
mp-9462	CsTeSe3	0	most materials
mp-9460	Zn3N2	0	most materials
mp-94	Cd	0	most materials
mp-9392	Sr4Al6TeO12	0	most materials
mp-9386	CsAu3Se2	0	most materials
mp-9385	RbAu3Se2	0	most materials
mp-9384	CsAu3S2	0	most materials
mp-9380	SrGe4O9	0	most materials
mp-938	GeTe	0	most materials
mp-9379	Sr(SnAs)2	0	most materials
mp-9338	Ba2MgSi2O7	0	most materials
mp-9332	KGaPO4F	0	most materials
mp-9330	CdPS3	0	most materials
mp-9322	Rb2Sn2Se5	0	most materials
mp-9307	Ba2ZnN2	0	most materials
mp-9306	Sr2ZnN2	0	most materials
mp-9298	Sr(AuO2)2	0	most materials
mp-9297	Ba(AuO2)2	0	most materials
mp-9274	Rb3Sb2Au3	0	most materials
mp-9273	K3Sb2Au3	0	most materials
mp-927	CuP2	0	most materials
mp-9268	KSe	0	most materials
mp-9264	NaTeAu	0	most materials
mp-9254	Al2Te5	0	most materials
mp-9250	RbLiSe	0	most materials
mp-9249	NaGeAu	0	most materials
mp-9230	KAlAs2O7	0	most materials
mp-9216	Ca3Tl2O6	0	most materials
mp-9212	NaAlO2	0	most materials
mp-9205	KSeO2F	0	most materials
mp-9203	Al6Cd4SO12	0	most materials
mp-9200	K3AuO	0	most materials
mp-9197	Li3AsO4	0	most materials
mp-9195	BaCuSeF	0	most materials
mp-9178	CdSe2O5	0	most materials
mp-9158	LiCuO2	0	most materials
mp-9157	K3AlO3	0	most materials
mp-9146	CdHgO2	0	most materials
mp-9145	Rb2SnSe3	0	most materials
mp-9144	LiAsF6	0	most materials
mp-9143	LiPF6	0	most materials
mp-913	CdP2	0	most materials
mp-9127	Ba(SbO3)2	0	most materials
mp-9126	Sr(SbO3)2	0	most materials
mp-9125	Ca(SbO3)2	0	most materials
mp-9124	LiZnAs	0	most materials
mp-9122	CaP3	0	most materials
mp-909	As2Se3	0	most materials
mp-9075	CdCuF4	0	most materials
mp-9069	K2NaAlAs2	0	most materials
mp-9068	K2NaAlP2	0	most materials
mp-9066	NaLi2AsO4	0	most materials
mp-9064	RbTe	0	most materials
mp-9063	RbSe	0	most materials
mp-9062	RbS	0	most materials
mp-902	BaZn	0	most materials
mp-9010	RbAuS	0	most materials
mp-9008	RbTeAu	0	most materials
mp-8989	Na2P2PdO7	0	most materials
mp-8977	Ca2PN3	0	most materials
mp-8975	Hg3(AsO4)2	0	most materials
mp-8973	NaSi2N3	0	most materials
mp-8966	K2Sn2Se5	0	most materials
mp-8965	K2Sn2S5	0	most materials
mp-8963	Cs2HgF4	0	most materials
mp-8962	Rb2HgF4	0	most materials
mp-8959	CsK2PdF5	0	most materials
mp-8958	RbPd2F5	0	most materials
mp-8934	Cs2SnAs2	0	most materials
mp-8932	Cs2SiP2	0	most materials
mp-8931	Rb2SnAs2	0	most materials
mp-8930	K2GeAs2	0	most materials
mp-8922	Cd(SbO3)2	0	most materials
mp-8921	Cd4P6SN12	0	most materials
mp-8914	SrGaSn	0	most materials
mp-8892	LiInF4	0	most materials
mp-8890	Cs(SbS2)2	0	most materials
mp-8877	Sr4Al6SO12	0	most materials
mp-8876	Ca4Al6SO12	0	most materials
mp-8868	Ba3NaN	0	most materials
mp-8861	Rb2MgF4	0	most materials
mp-886	Ga2O3	0	most materials
mp-8858	RbCuF3	0	most materials
mp-8857	Cs2As2Pd	0	most materials
mp-8851	BaCuP2O7	0	most materials
mp-8843	SrSiPd	0	most materials
mp-8842	CaSiPd	0	most materials
mp-8836	CaAlF5	0	most materials
mp-8818	Ca2ZnN2	0	most materials
mp-8812	Rb2GeF6	0	most materials
mp-8810	SrZn2(PO4)2	0	most materials
mp-8799	RbNaS	0	most materials
mp-8790	Ba2CuO3	0	most materials
mp-8789	Ca4As2O	0	most materials
mp-8756	KLiSe	0	most materials
mp-8755	KNaTe	0	most materials
mp-8754	NaLiTe	0	most materials
mp-8753	K4HgP2	0	most materials
mp-8752	Na4CdP2	0	most materials
mp-8751	RbLiS	0	most materials
mp-8724	K2TeO3	0	most materials
mp-8723	AsF5	0	most materials
mp-8708	Mg(AuF4)2	0	most materials
mp-8704	K3SbSe4	0	most materials
mp-8703	Na3SbSe4	0	most materials
mp-8702	LiGaGeO4	0	most materials
mp-8683	K5As2Au	0	most materials
mp-867998	In15SnO24	0	most materials
mp-867964	Rb4P2PbSe8	0	most materials
mp-867785	RbF2	0	most materials
mp-867731	Cd2PbO4	0	most materials
mp-867730	Cs2SnO3	0	most materials
mp-867570	Rb4Sb2O5	0	most materials
mp-867359	AlTlSe2	0	most materials
mp-867355	TeBr2	0	most materials
mp-867340	K2BaCdSb2	0	most materials
mp-867339	CsK2Bi	0	most materials
mp-867336	K2SrCdSb2	0	most materials
mp-867335	K2SbAu	0	most materials
mp-8673	Li2SnTeO6	0	most materials
mp-867268	K4P2PdS8	0	most materials
mp-867203	Sr2CdAs2	0	most materials
mp-867194	Sr(MgAs)2	0	most materials
mp-867168	Sr2SbAu	0	most materials
mp-866688	Cs4P2PdSe8	0	most materials
mp-866660	K3P2AuSe8	0	most materials
mp-866651	KSiBiS4	0	most materials
mp-866646	KGeBiS4	0	most materials
mp-866637	KPPdS4	0	most materials
mp-866615	CsAg2AsS3	0	most materials
mp-8666	CsAgO	0	most materials
mp-866503	Ca2SnS4	0	most materials
mp-866314	Ca5Al2(SiN4)2	0	most materials
mp-866311	Bi3BrO4	0	most materials
mp-866291	AgBr	0	most materials
mp-866132	Na2TlSb	0	most materials
mp-865980	CsAgPSe3	0	most materials
mp-865961	K3Bi(AsSe2)6	0	most materials
mp-8658	CsNaSe	0	most materials
mp-865274	TlInS2	0	most materials
mp-865101	NaLi2Bi	0	most materials
mp-864928	BrCl	0	most materials
mp-864766	NaMgSO4F	0	most materials
mp-864638	Ba2InBiS5	0	most materials
mp-863374	BiTeO4	0	most materials
mp-863358	KAl11O17	0	most materials
mp-862631	Ba2SbAu	0	most materials
mp-8624	K2Sn2O3	0	most materials
mp-861906	BaNa2Mg(PO4)2	0	most materials
mp-861898	Rb3GePSe7	0	most materials
mp-8616	ScAg(PS3)2	0	most materials
mp-8603	RbAgO	0	most materials
mp-8585	Pd(AuF4)2	0	most materials
mp-8579	Ba(AgS)2	0	most materials
mp-8564	CsK2Sc(PO4)2	0	most materials
mp-8560	SF6	0	most materials
mp-856	SnO2	0	most materials
mp-8543	Na3AlAs2	0	most materials
mp-8539	SrSnP	0	most materials
mp-8537	S(OF)2	0	most materials
mp-8511	PF5	0	most materials
mp-849527	Rb3InO3	0	most materials
mp-8491	LiInP2O7	0	most materials
mp-8484	ZnO2	0	most materials
mp-8479	Tl4SiS4	0	most materials
mp-8468	Sr(SbPd)2	0	most materials
mp-8459	CdSO4	0	most materials
mp-8452	NaLiS	0	most materials
mp-8450	Rb2Li2GeO4	0	most materials
mp-8449	Rb2Li2SiO4	0	most materials
mp-8446	K2CuP	0	most materials
mp-844	Ca3N2	0	most materials
mp-8432	CaCuP	0	most materials
mp-8430	KLiS	0	most materials
mp-8426	K2Se	0	most materials
mp-8422	Sr(AlSe2)2	0	most materials
mp-8416	BaCaGaF7	0	most materials
mp-8411	Na2AgAs	0	most materials
mp-841	Li2O2	0	most materials
mp-8399	CsCdF3	0	most materials
mp-8393	Tl3SbS3	0	most materials
mp-8389	Na6ZnS4	0	most materials
mp-8387	Tl6TeO6	0	most materials
mp-8378	Tl3SbS4	0	most materials
mp-8348	TlSbF6	0	most materials
mp-8333	RbNaSnF6	0	most materials
mp-8331	Li12Mg3Si4	0	most materials
mp-833	CaPd2	0	most materials
mp-8314	Cs2NaAsO4	0	most materials
mp-8313	Cs2Li2GeO4	0	most materials
mp-8311	Si3NiP4	0	most materials
mp-8300	Ba4As2O	0	most materials
mp-8299	Sr4As2O	0	most materials
mp-8298	Sr4P2O	0	most materials
mp-8290	BaSnF6	0	most materials
mp-8289	SnF3	0	most materials
mp-8281	Ba(CdAs)2	0	most materials
mp-8279	Ba(CdP)2	0	most materials
mp-8278	Ba(MgP)2	0	most materials
mp-8277	Sr(CdP)2	0	most materials
mp-8276	Sr(ZnP)2	0	most materials
mp-827	KN3	0	most materials
mp-8267	KPS3	0	most materials
mp-8258	BaAl4S7	0	most materials
mp-8249	TlPS3	0	most materials
mp-8248	Rb2TeO3	0	most materials
mp-8236	Ba(PPd)2	0	most materials
mp-8235	K2SiP2	0	most materials
mp-8224	CaSnF6	0	most materials
mp-8217	Cs2GeF6	0	most materials
mp-8202	CsRb2PdF5	0	most materials
mp-8201	Rb3PdF5	0	most materials
mp-820	HgSe	0	most materials
mp-8198	Rb3Cu5O4	0	most materials
mp-8194	Ba2GeP2	0	most materials
mp-8190	Tl2SiS3	0	most materials
mp-8188	KScO2	0	most materials
mp-8187	K2ZnO2	0	most materials
mp-8184	Li2ZnGeO4	0	most materials
mp-8180	LiNO3	0	most materials
mp-8177	HgF2	0	most materials
mp-8176	RbTlO2	0	most materials
mp-8175	KTlO2	0	most materials
mp-8161	CaPdF4	0	most materials
mp-8153	NaHgPO4	0	most materials
mp-8150	Ba(CdSb)2	0	most materials
mp-8147	K2As2Pd	0	most materials
mp-8140	AsPO4	0	most materials
mp-810	NiSb	0	most materials
mp-8094	Ba2Hg	0	most materials
mp-8093	Ba2Cd	0	most materials
mp-8081	Na2SnF6	0	most materials
mp-8076	Na3SbO3	0	most materials
mp-8070	Li2BeSiO4	0	most materials
mp-8054	NaSc(GeO3)2	0	most materials
mp-8041	Rb2S	0	most materials
mp-804	GaN	0	most materials
mp-8017	AlCuTe2	0	most materials
mp-8016	AlCuSe2	0	most materials
mp-7988	Cs2O	0	most materials
mp-7979	K2PdF6	0	most materials
mp-7971	Ba4Li(SbO4)3	0	most materials
mp-7961	Sr3SnO	0	most materials
mp-7956	Na3Sb	0	most materials
mp-795	LiSi	0	most materials
mp-7944	NaSb	0	most materials
mp-7943	LiAs	0	most materials
mp-7941	Li6TeO6	0	most materials
mp-7931	SrP	0	most materials
mp-7922	CaPdF6	0	most materials
mp-7921	MgPdF6	0	most materials
mp-7914	NaScO2	0	most materials
mp-7913	BeSiN2	0	most materials
mp-7911	KCuO	0	most materials
mp-7910	Al2HgTe4	0	most materials
mp-7909	Al2CdTe4	0	most materials
mp-7908	Al2ZnTe4	0	most materials
mp-7907	Al2ZnSe4	0	most materials
mp-7906	Al2HgS4	0	most materials
mp-7899	BaCdO2	0	most materials
mp-7896	CsO	0	most materials
mp-7878	Ca(AgGe)2	0	most materials
mp-7874	LiGaGe	0	most materials
mp-7863	Rb2Sn2O3	0	most materials
mp-7849	AlAsO4	0	most materials
mp-7848	AlPO4	0	most materials
mp-7841	Ba(GaSe2)2	0	most materials
mp-782	Te2Pd	0	most materials
mp-7819	Pd4S	0	most materials
mp-7818	Pd4Se	0	most materials
mp-7808	BaP3	0	most materials
mp-7801	CaGeN2	0	most materials
mp-7798	MgGeN2	0	most materials
mp-7791	Li2GeF6	0	most materials
mp-779000	Rb4SbO4	0	most materials
mp-778924	ZnSeO4	0	most materials
mp-778602	Ba3GeO5	0	most materials
mp-7786	CsCu3S2	0	most materials
mp-778057	Na2SnO2	0	most materials
mp-7773	Na2AsAu	0	most materials
mp-777050	NaNiPO4	0	most materials
mp-777050	NaNiPO4	0	most materials
mp-777007	Ni(IO3)2	0	most materials
mp-777007	Ni(IO3)2	0	most materials
mp-776093	CsAsO3	0	most materials
mp-776084	BaSiO3	0	most materials
mp-7756	SrLiSb	0	most materials
mp-775485	Bi3PO7	0	most materials
mp-775430	LiBi3(IO2)2	0	most materials
mp-774941	Li(NiO2)2	0	most materials
mp-774907	KLiZnS2	0	most materials
mp-774736	LiCuS	0	most materials
mp-774702	Li3BiO4	0	most materials
mp-774432	K2Li3NiO4	0	most materials
mp-774432	K2Li3NiO4	0	most materials
mp-7744	LiSO3F	0	most materials
mp-774	CaNi5	0	most materials
mp-773785	K2TeO4	0	most materials
mp-773137	KCaBi	0	most materials
mp-772981	Li2Zn3(Ge3O8)2	0	most materials
mp-772813	Ca2Cu2O5	0	most materials
mp-772788	Ba2Cu2O5	0	most materials
mp-772779	Ca(SeO3)2	0	most materials
mp-772617	Zn(NO3)2	0	most materials
mp-772290	LiAgO	0	most materials
mp-772282	Sb4I2O5	0	most materials
mp-772228	CdP4O11	0	most materials
mp-772099	Cd(CuO2)2	0	most materials
mp-771861	LiNiSbO4	0	most materials
mp-771861	LiNiSbO4	0	most materials
mp-771750	Sr(IO3)2	0	most materials
mp-7715	AgF2	0	most materials
mp-771359	Cu2O3	0	most materials
mp-771255	Cs4SiO4	0	most materials
mp-771185	K2Ge2O5	0	most materials
mp-771132	Ba3Ga4O9	0	most materials
mp-771046	Mg(NO3)2	0	most materials
mp-770932	LiSbO3	0	most materials
mp-770846	Ba3Sn2O7	0	most materials
mp-770773	Rb2S2O7	0	most materials
mp-770771	SrSc2O4	0	most materials
mp-7704	Ca(AlSi)2	0	most materials
mp-770397	Mg(NiO2)2	0	most materials
mp-770112	Zn(NiO2)2	0	most materials
mp-769971	BaGa4O7	0	most materials
mp-769961	Li4Ni3SbO8	0	most materials
mp-769864	Cs2NiO2	0	most materials
mp-769152	Sc(ClO4)3	0	most materials
mp-769144	SnGeO3	0	most materials
mp-769077	Mg2Te3O8	0	most materials
mp-768950	Sn2(SO4)3	0	most materials
mp-768941	Sr3TeO6	0	most materials
mp-768915	Na3AuO3	0	most materials
mp-768870	Ca(ClO3)2	0	most materials
mp-7688	Li2CdGeO4	0	most materials
mp-768451	Cu2(SO4)3	0	most materials
mp-7684	Tl3AsSe3	0	most materials
mp-768368	K4I2O	0	most materials
mp-768285	Be2GeO4	0	most materials
mp-768232	Rb3SbO3	0	most materials
mp-768150	LiBi3(BrO2)2	0	most materials
mp-767114	SnP4O11	0	most materials
mp-7670	K2Se3	0	most materials
mp-766947	Sn(PO3)2	0	most materials
mp-7667	K2S3	0	most materials
mp-766504	Te2(PO4)3	0	most materials
mp-7664	Na6ZnO4	0	most materials
mp-766387	RbAl11O17	0	most materials
mp-766341	NaSb5O13	0	most materials
mp-766217	Sr4Cu2O7	0	most materials
mp-7657	K3SiTe3	0	most materials
mp-765696	Na4(NiO2)5	0	most materials
mp-7656	Na5GaO4	0	most materials
mp-765559	LiAgF4	0	most materials
mp-765493	Ba2Sb2O5	0	most materials
mp-7652	Na5TlO4	0	most materials
mp-7650	RbScO2	0	most materials
mp-7645	KAl(SO4)2	0	most materials
mp-7643	K2AgSb	0	most materials
mp-764295	Na4(NiO2)9	0	most materials
mp-7642	K2AgAs	0	most materials
mp-764098	Li2Ni3TeO8	0	most materials
mp-764098	Li2Ni3TeO8	0	most materials
mp-7639	Na2CuP	0	most materials
mp-7622	KSO4	0	most materials
mp-761825	LiSb(TeO4)3	0	most materials
mp-761686	Na2BiO3	0	most materials
mp-761184	Na2SnO3	0	most materials
mp-7611	Li2CaGeO4	0	most materials
mp-761037	Hg(ClO3)2	0	most materials
mp-761036	CdSeO4	0	most materials
mp-7610	Li2CaSiO4	0	most materials
mp-760825	LiCu3F10	0	most materials
mp-7608	Li2PdO2	0	most materials
mp-760483	Li2PdO3	0	most materials
mp-760482	F	0	most materials
mp-760417	Rb4I2O	0	most materials
mp-760403	CaCd3O4	0	most materials
mp-760400	Na5BiO5	0	most materials
mp-7604	Mg3NF3	0	most materials
mp-760255	Li3CuF6	0	most materials
mp-760109	Bi2(SO4)3	0	most materials
mp-759924	Bi14SO24	0	most materials
mp-759541	Ba(PdO2)2	0	most materials
mp-7595	GeF2	0	most materials
mp-759405	Bi3O2F5	0	most materials
mp-7594	CsLiF2	0	most materials
mp-759223	Sn(SO4)2	0	most materials
mp-7592	AgF	0	most materials
mp-758571	Al11TlO17	0	most materials
mp-758418	Tl16O15F17	0	most materials
mp-758337	Ca2P6O17	0	most materials
mp-758265	LiCu2F6	0	most materials
mp-758059	Ba7Pb17O24	0	most materials
mp-7580	Hg3(SF)2	0	most materials
mp-757850	K4Sb2O5	0	most materials
mp-7575	LiZnN	0	most materials
mp-757407	Sr2Tl2O5	0	most materials
mp-757280	Ba2As6O11	0	most materials
mp-757242	Li5AuO4	0	most materials
mp-7572	MgSO4	0	most materials
mp-757192	SnP2O7	0	most materials
mp-757115	KSb5O13	0	most materials
mp-757111	SbOF3	0	most materials
mp-757	Li3As	0	most materials
mp-756970	Al2(SeO4)3	0	most materials
mp-756919	Mg3(AsO4)2	0	most materials
mp-7569	KAsF6	0	most materials
mp-756746	Rb4PbO4	0	most materials
mp-7566	InPO4	0	most materials
mp-756570	Rb4SnO3	0	most materials
mp-756372	Rb2MgO2	0	most materials
mp-756316	Li3SbS4	0	most materials
mp-7561	SrPd3O4	0	most materials
mp-756044	Na3AsO4	0	most materials
mp-755950	Ba2Sc2O5	0	most materials
mp-755893	CaBiO3	0	most materials
mp-755813	Sc6N2O5	0	most materials
mp-755802	K2MgO2	0	most materials
mp-755492	NaCuP2O7	0	most materials
mp-755478	CdBiO3	0	most materials
mp-755428	Rb3ClO	0	most materials
mp-755419	Bi2TeO2	0	most materials
mp-755401	Na3CuO2	0	most materials
mp-755363	Ba3SiO	0	most materials
mp-755293	Sr4Sb2O	0	most materials
mp-755287	Ca3CdO4	0	most materials
mp-755082	Sr3(AsO4)2	0	most materials
mp-754967	BaTeO4	0	most materials
mp-754897	BaTl2O4	0	most materials
mp-754826	CsScO2	0	most materials
mp-754712	NClO3	0	most materials
mp-754665	Pb(BrO3)2	0	most materials
mp-754598	Hg3SeO6	0	most materials
mp-754596	RbGaO2	0	most materials
mp-754515	BaMgGe	0	most materials
mp-754514	N2	0	most materials
mp-754329	CdSnO3	0	most materials
mp-754326	NaAgO2	0	most materials
mp-754214	TlAsO4	0	most materials
mp-754206	LiBi3(ClO2)2	0	most materials
mp-754126	CuAuO2	0	most materials
mp-754118	Sr(AsO3)2	0	most materials
mp-754065	Hg(SbO3)2	0	most materials
mp-753945	ClOF3	0	most materials
mp-753798	Rb2SnO3	0	most materials
mp-753746	Rb2O	0	most materials
mp-753671	PNO	0	most materials
mp-753670	CaPbI4	0	most materials
mp-753594	BiOF	0	most materials
mp-753519	CuPO4	0	most materials
mp-753455	BiOF3	0	most materials
mp-7534	K2Cd2O3	0	most materials
mp-753257	LiCuF4	0	most materials
mp-753031	LiCu5F12	0	most materials
mp-753	ZnSb	0	most materials
mp-752767	LiAgF2	0	most materials
mp-752692	K2SnO2	0	most materials
mp-752602	BiBr3	0	most materials
mp-752580	RbNO2	0	most materials
mp-752573	Ba(NaSi2)2	0	most materials
mp-752538	KSnO2	0	most materials
mp-752443	Te(S2O7)2	0	most materials
mp-7505	K2P2Pd	0	most materials
mp-7500	Na4SiO4	0	most materials
mp-7483	KHgF3	0	most materials
mp-7482	RbHgF3	0	most materials
mp-7472	RbAuO2	0	most materials
mp-7471	Li3AuO3	0	most materials
mp-7470	RbCuO	0	most materials
mp-7469	NaCuO	0	most materials
mp-7467	RbCuO2	0	most materials
mp-7461	Hg2SO4	0	most materials
mp-746	Sr5Si3	0	most materials
mp-7457	SnF2	0	most materials
mp-745012	Ni2P2O7	0	most materials
mp-745012	Ni2P2O7	0	most materials
mp-7449	Cs2Se3	0	most materials
mp-7447	Rb2Se3	0	most materials
mp-7446	Rb2S3	0	most materials
mp-7444	RbSb	0	most materials
mp-7441	KP	0	most materials
mp-7440	NaP	0	most materials
mp-7439	K3Cu3P2	0	most materials
mp-7438	KZnSb	0	most materials
mp-7437	KZnP	0	most materials
mp-7436	KCuTe	0	most materials
mp-7435	KCuSe	0	most materials
mp-7433	NaCuSe	0	most materials
mp-7432	Sr(CdSb)2	0	most materials
mp-7431	Sr(ZnSb)2	0	most materials
mp-7430	Ca(CdSb)2	0	most materials
mp-743	RbN3	0	most materials
mp-7429	Ca(ZnSb)2	0	most materials
mp-7427	Ba(ZnAs)2	0	most materials
mp-7426	Ba(ZnP)2	0	most materials
mp-7421	KZnAs	0	most materials
mp-7420	KHgAs	0	most materials
mp-7404	Na3SbO4	0	most materials
mp-7400	NaAlGe	0	most materials
mp-7394	BaAg2GeS4	0	most materials
mp-7392	Na2AgSb	0	most materials
mp-7390	SrGe2	0	most materials
mp-7388	NaAuF4	0	most materials
mp-7387	KAgF4	0	most materials
mp-7386	NaAgF4	0	most materials
mp-738	Sb2Au	0	most materials
mp-7379	TlCdSb	0	most materials
mp-7378	NaCdAs	0	most materials
mp-7376	Sr3(AlSn)2	0	most materials
mp-7374	Ba(CuO)2	0	most materials
mp-7366	Sr(AgSn)2	0	most materials
mp-7365	Sr(SiAu)2	0	most materials
mp-7364	Ca(SiAu)2	0	most materials
mp-7363	Sr(ZnGe)2	0	most materials
mp-736	Li3P	0	most materials
mp-7352	MgCuP	0	most materials
mp-733	GeO2	0	most materials
mp-7297	Cs2SnF6	0	most materials
mp-7293	HgPSe3	0	most materials
mp-7289	K2Te3	0	most materials
mp-7288	Sc2SO2	0	most materials
mp-7280	PPdS	0	most materials
mp-728	Li2Pd	0	most materials
mp-7277	Tl2GeS3	0	most materials
mp-7263	CaGaN	0	most materials
mp-726	SeO2	0	most materials
mp-7258	K4SnO4	0	most materials
mp-7237	CuAgO2	0	most materials
mp-7232	Cs2HgO2	0	most materials
mp-721592	Ca6Al7O16	0	most materials
mp-721236	Li10Sn(PS6)2	0	most materials
mp-720971	Ca12Al11Si3Cl5O32	0	most materials
mp-720658	Cs3Mg3In(PO3)12	0	most materials
mp-720509	Li10Si(PS6)2	0	most materials
mp-7205	LiInSiO4	0	most materials
mp-720112	Sr5Al10(Si7O24)2	0	most materials
mp-720104	Na4Al3Ge3NO14	0	most materials
mp-720	TlF	0	most materials
mp-7198	SrPSe3	0	most materials
mp-7192	Sc2Sb	0	most materials
mp-7191	Sr3GaN3	0	most materials
mp-715434	NiO	0	most materials
mp-715434	NiO	0	most materials
mp-714961	Ni3O4	0	most materials
mp-714961	Ni3O4	0	most materials
mp-713	KAs	0	most materials
mp-7128	Cd(AsO3)2	0	most materials
mp-7123	KSb(PSe3)2	0	most materials
mp-7118	Rb4SnO4	0	most materials
mp-7117	LiAlSe2	0	most materials
mp-7104	CsCaF3	0	most materials
mp-7090	NaMgSb	0	most materials
mp-7089	KMgSb	0	most materials
mp-7084	SrCaSi	0	most materials
mp-7080	Li5(NiN)3	0	most materials
mp-7077	KAuS	0	most materials
mp-7074	NaSc(SiO3)2	0	most materials
mp-7068	Sr3(AlSi)2	0	most materials
mp-7067	Ca(CdAs)2	0	most materials
mp-706	HgF	0	most materials
mp-705549	Sr18Ni13O42	0	most materials
mp-7041	CaHgO2	0	most materials
mp-7038	TlPd2Se3	0	most materials
mp-7035	CaMgAsO4F	0	most materials
mp-700	GeSe	0	most materials
mp-6999	ScPS4	0	most materials
mp-6989	BaSeO3	0	most materials
mp-6987	Sr(GaTe2)2	0	most materials
mp-6984	K2SiAs2	0	most materials
mp-6983	NaAgO	0	most materials
mp-6980	ScCuS2	0	most materials
mp-697670	KAlSi3O8	0	most materials
mp-6973	CsNaS	0	most materials
mp-6968	Cs2KCuF6	0	most materials
mp-6963	Ba(SbPd)2	0	most materials
mp-696138	Li10Ge(PS6)2	0	most materials
mp-6960	Rb2SiAs2	0	most materials
mp-6955	KGeNO	0	most materials
mp-6951	RbCdF3	0	most materials
mp-695070	Ca3Ga2Si(SnO6)2	0	most materials
mp-694935	K3LiMg4(Si2O5)6	0	most materials
mp-6949	InF3	0	most materials
mp-694852	K5RbZn4Sn5S17	0	most materials
mp-693753	BaNa5Ca7P6(O8F)3	0	most materials
mp-693620	KCa2Be2Al(Si2O5)6	0	most materials
mp-6931	Sr(AlSi)2	0	most materials
mp-6929	Ca2As2O7	0	most materials
mp-6926	Ca(PPd)2	0	most materials
mp-690977	NaP3(PbO3)4	0	most materials
mp-690914	KNaMg5(Si2O5)6	0	most materials
mp-689925	Cs2NiF6	0	most materials
mp-6875	BaNa2Al4(SiO4)4	0	most materials
mp-686540	Na3Al2P2O8F3	0	most materials
mp-686464	Ca10P6SO24	0	most materials
mp-686208	Li5SiN3	0	most materials
mp-6860	Na3AlP3NO9	0	most materials
mp-685991	Li5SiP3	0	most materials
mp-685810	AsN2F7	0	most materials
mp-6856	Be3Zn4Si3SO12	0	most materials
mp-685478	Na2PdO3	0	most materials
mp-684690	Sc2Se3	0	most materials
mp-6844	KLi3Si12(SnO15)2	0	most materials
mp-684024	Li2SiN2	0	most materials
mp-684	BaS2	0	most materials
mp-683875	TeS7Br2	0	most materials
mp-6820	Cu2Hg2SF6	0	most materials
mp-682	NaF	0	most materials
mp-6812	KBaPO4	0	most materials
mp-680722	As2Pb14Cl4O17	0	most materials
mp-680301	K3AsO4	0	most materials
mp-6800	KLiSO4	0	most materials
mp-679927	Rb2Sc(NO3)5	0	most materials
mp-677611	TlAgAs2PbS5	0	most materials
mp-677573	NaCa2Mg2(AsO4)3	0	most materials
mp-677520	KBa6Zn4(GaO3)7	0	most materials
mp-677335	GaPO4	0	most materials
mp-677164	CuAs2Pb6Cl7O6	0	most materials
mp-677095	Na2CaSn2(GeO4)3	0	most materials
mp-677017	KRb5Zn4Sn5S17	0	most materials
mp-677013	Na3Pb2S3ClO12	0	most materials
mp-677	SrCd2	0	most materials
mp-676861	AlSbO4	0	most materials
mp-6766	CaMg(SiO3)2	0	most materials
mp-6765	Li3AlGeO5	0	most materials
mp-676483	NaLiZnP2O7	0	most materials
mp-676464	Cd3AsI3	0	most materials
mp-6764	BaSi2(NO)2	0	most materials
mp-676305	Mg4Sb2O9	0	most materials
mp-676274	Tl9SbSe6	0	most materials
mp-676130	TlSnF3	0	most materials
mp-676109	Li3InCl6	0	most materials
mp-676	CaN6	0	most materials
mp-675989	Tl9BiSe6	0	most materials
mp-675941	Li7IN2	0	most materials
mp-6759	BaGa2(SiO4)2	0	most materials
mp-675651	MgPS3	0	most materials
mp-675531	NaBiS2	0	most materials
mp-675524	CsPbCl3	0	most materials
mp-6755	KSn4(PO4)3	0	most materials
mp-675424	Ba2P2O7	0	most materials
mp-675374	Al2PbSe4	0	most materials
mp-675132	K6InP3	0	most materials
mp-675011	CsPF6	0	most materials
mp-674508	RbPbF3	0	most materials
mp-674333	Na3PO4	0	most materials
mp-6726	CsLiSO4	0	most materials
mp-672289	Ge3N4	0	most materials
mp-672273	AlBiCl6	0	most materials
mp-672251	CsGaBr4	0	most materials
mp-672234	N2	0	most materials
mp-672233	N2	0	most materials
mp-672	CdS	0	most materials
mp-6702	Na7In4P9O32	0	most materials
mp-6699	NaMgPO4	0	most materials
mp-6695	BaCdP2O7	0	most materials
mp-669458	Cs3Bi2I9	0	most materials
mp-669353	Cs2TeO4	0	most materials
mp-6686	K2NaInF6	0	most materials
mp-6684	NaCdPO4	0	most materials
mp-6675	Na2Zn(SiO3)2	0	most materials
mp-667360	CsSbOF4	0	most materials
mp-667323	Mg(GaS2)2	0	most materials
mp-667294	Ca5(PPd)6	0	most materials
mp-667	Tl2S	0	most materials
mp-6669	Sr5P3O12F	0	most materials
mp-6663	NaLiGe4O9	0	most materials
mp-662535	PbSe2O5	0	most materials
mp-662530	KNiPS4	0	most materials
mp-6623	Rb2Cd2(SO4)3	0	most materials
mp-661	AlN	0	most materials
mp-6596	MgAlPO5	0	most materials
mp-6591	SrLiAlF6	0	most materials
mp-6586	K2NaAlF6	0	most materials
mp-6571	BaCuAs2O7	0	most materials
mp-6565	Li3Sc2(PO4)3	0	most materials
mp-6564	Sr2MgSi2O7	0	most materials
mp-6560	KSO2F	0	most materials
mp-6557	Cs2PO3F	0	most materials
mp-655	Na3As	0	most materials
mp-653561	Tl2GePbS4	0	most materials
mp-6528	Cs2NaAlF6	0	most materials
mp-6527	Na3Li3In2F12	0	most materials
mp-6526	NaGeSbO5	0	most materials
mp-6525	NaSn2(PO4)3	0	most materials
mp-652220	PBr2N	0	most materials
mp-6509	Sr3GaO4F	0	most materials
mp-6507	Na2Zn2Si2O7	0	most materials
mp-650619	Cs3Bi7Se12	0	most materials
mp-650532	Cs2K2Cd3O5	0	most materials
mp-650513	Ca3(InAs2)2	0	most materials
mp-6500	KRb2ScF6	0	most materials
mp-6496	Ba2Na(CuO2)3	0	most materials
mp-6493	CaMgSiO4	0	most materials
mp-6481	Na2ZnSi3O8	0	most materials
mp-648	Na2S	0	most materials
mp-647579	ZnBr2	0	most materials
mp-647366	KICl4	0	most materials
mp-647343	PBr7	0	most materials
mp-6473	Ca5P3O12F	0	most materials
mp-647164	Cu12Sb4S13	0	most materials
mp-6467	Na2CuP2O7	0	most materials
mp-646297	Hg4Pb2N6O19	0	most materials
mp-646102	Al3Bi5Cl12	0	most materials
mp-6450	K2LiAlP2	0	most materials
mp-6449	CdSi(CuS2)2	0	most materials
mp-644827	TePCl9	0	most materials
mp-6442	LiAl(Si2O5)2	0	most materials
mp-6441	K2PO3F	0	most materials
mp-643460	SnHg2(SBr)2	0	most materials
mp-6434	RbAlSiO4	0	most materials
mp-643203	Cu6PbSe2Cl5O8	0	most materials
mp-6425	Li3In2(PO4)3	0	most materials
mp-641923	Cs2SnBr6	0	most materials
mp-641703	Li7P3S11	0	most materials
mp-641	As2S3	0	most materials
mp-6406	Na2MgSiO4	0	most materials
mp-6404	BaCa2(PN2)6	0	most materials
mp-6402	Na2ZnGeO4	0	most materials
mp-6397	Na2Ca(SO4)2	0	most materials
mp-6391	Na2ZnSiO4	0	most materials
mp-638749	Te3(PdBr)4	0	most materials
mp-6386	K2ZnGeO4	0	most materials
mp-638586	Te3Pd13	0	most materials
mp-638424	Sb2S2O9	0	most materials
mp-6384	RbSO2F	0	most materials
mp-638150	KPPbS4	0	most materials
mp-638061	AlInCl4	0	most materials
mp-638009	RbPPbS4	0	most materials
mp-637206	AlBiSeCl4	0	most materials
mp-637194	Cs3Sc2Cl9	0	most materials
mp-636675	Ga2I3	0	most materials
mp-636598	Rb2ZnBr4	0	most materials
mp-6356	Cd2GaAgS4	0	most materials
mp-635413	Cs3Bi	0	most materials
mp-634984	Mg5(Si8Pd5)2	0	most materials
mp-6333	NaIn(SiO3)2	0	most materials
mp-6318	KLiSO4	0	most materials
mp-630875	Ca2In4Au3	0	most materials
mp-630851	Cs3NaPb4	0	most materials
mp-6300	RbHgSbSe3	0	most materials
mp-6299	K2Mg2(SO4)3	0	most materials
mp-6290	NaInP2O7	0	most materials
mp-628908	KICl2	0	most materials
mp-628665	AlBiTeCl4	0	most materials
mp-628647	TlHg3As2Cl3	0	most materials
mp-628643	CuAsPbS3	0	most materials
mp-628637	Cu3BiSe2BrO8	0	most materials
mp-628617	Cs4K2Si2CuO8	0	most materials
mp-628185	K3NaSn3Se8	0	most materials
mp-6280	Al2Si(O2F)2	0	most materials
mp-6278	Zn2Cu(AsO4)2	0	most materials
mp-6273	Ba4Na(SbO4)3	0	most materials
mp-6255	Ca3Sc2(SiO4)3	0	most materials
mp-624571	Cs2Ni(NO3)4	0	most materials
mp-624299	Cu7S4	0	most materials
mp-624234	TePb2O5	0	most materials
mp-624190	GePbS3	0	most materials
mp-6226	NaSn4(PO4)3	0	most materials
mp-622491	Pb13(Br3O5)2	0	most materials
mp-6224	LiScSiO4	0	most materials
mp-622199	KCuP2Se5	0	most materials
mp-622195	CsSO3F	0	most materials
mp-621924	BaCdGaF7	0	most materials
mp-6215	AgHgAsS3	0	most materials
mp-6211	RbLiSO4	0	most materials
mp-620652	NaSr2AlP3	0	most materials
mp-6204	Cs2NaScF6	0	most materials
mp-619753	Cs4CdNi3F12	0	most materials
mp-619753	Cs4CdNi3F12	0	most materials
mp-619661	Pb3(IO)2	0	most materials
mp-619575	ClF3	0	most materials
mp-619546	Cs2HgBr4	0	most materials
mp-619510	CsHg2Br5	0	most materials
mp-618309	Bi2AuO5	0	most materials
mp-6175	BaLi2P2O7	0	most materials
mp-6174	Mg2Al4Si5O18	0	most materials
mp-616668	Na2AlNiF7	0	most materials
mp-616668	Na2AlNiF7	0	most materials
mp-616587	RbPO3	0	most materials
mp-616564	RbPbIO6	0	most materials
mp-616501	InCu6ClO8	0	most materials
mp-616461	Na2ZnCl4	0	most materials
mp-616439	Cs2CuCl4	0	most materials
mp-616327	In3Te3I	0	most materials
mp-6163	Cs2NaGaF6	0	most materials
mp-616220	Rb3(Cu4Se3)2	0	most materials
mp-616127	Ni(AuF4)2	0	most materials
mp-616026	Sr3InP3	0	most materials
mp-6160	Rb2PO3F	0	most materials
mp-615789	Ba2(CuO2)3	0	most materials
mp-615754	RbCuPdF5	0	most materials
mp-615746	RbBiF4	0	most materials
mp-614803	Cs2TeO3	0	most materials
mp-614603	CsI	0	most materials
mp-614572	Ca3InP3	0	most materials
mp-613910	BaNiF6	0	most materials
mp-6137	Mg4P6SN12	0	most materials
mp-613569	K2SbF5	0	most materials
mp-6134	LiCaAlF6	0	most materials
mp-612740	In2Se3	0	most materials
mp-6118	Ca3Cu3(PO4)4	0	most materials
mp-611316	AsN(OF3)2	0	most materials
mp-6112	K6Na3GaSb4	0	most materials
mp-610491	BiSeCl	0	most materials
mp-6091	BaAl2(SiO4)2	0	most materials
mp-6089	BaZn2(PO4)2	0	most materials
mp-608555	Cs2SnCl6	0	most materials
mp-608516	CsGaCl4	0	most materials
mp-608014	K2Ge2Pb2O7	0	most materials
mp-607987	CsInI4	0	most materials
mp-607829	AlTlI4	0	most materials
mp-6078	Na2Cd3Si3O10	0	most materials
mp-607138	Sc5Bi3	0	most materials
mp-606503	Ca3InAu3	0	most materials
mp-6058	K2NaScF6	0	most materials
mp-6057	TlSnPS4	0	most materials
mp-605034	K2NiF6	0	most materials
mp-605034	K2NiF6	0	most materials
mp-605028	Te2Pd3Pb2	0	most materials
mp-6030	Be3Al2(SiO3)6	0	most materials
mp-6023	Tl2Sn(AsS3)2	0	most materials
mp-601867	Ba3(SnP2)2	0	most materials
mp-6017	Na3In(PO4)2	0	most materials
mp-6015	LiSiNO	0	most materials
mp-601326	Sr6Ge5N2	0	most materials
mp-5972	CsPd2F5	0	most materials
mp-5966	Cd2SnO4	0	most materials
mp-5962	NaMgAs	0	most materials
mp-5955	NaSbF6	0	most materials
mp-5942	NaAsS2	0	most materials
mp-5929	Na5SiP3	0	most materials
mp-5928	Al2CdS4	0	most materials
mp-5926	KCaF3	0	most materials
mp-5920	LiAlGe	0	most materials
mp-5915	TlNO3	0	most materials
mp-5910	CaCuSb	0	most materials
mp-5909	Zn2GeO4	0	most materials
mp-588	GaF3	0	most materials
mp-5878	KZnF3	0	most materials
mp-5874	TlAgTe	0	most materials
mp-5860	K2HgO2	0	most materials
mp-5854	LiGaO2	0	most materials
mp-5853	LiSi2N3	0	most materials
mp-5840	LiScO2	0	most materials
mp-5838	Ba2SiS4	0	most materials
mp-583615	K3In2As3	0	most materials
mp-5832	Li2Ge7O15	0	most materials
mp-5831	Cu(SbO3)2	0	most materials
mp-5830	Na3AsS3	0	most materials
mp-582708	Cs3GeAsSe5	0	most materials
mp-5824	Hg2NO4	0	most materials
mp-581716	Sr(InAu)3	0	most materials
mp-581024	CsK2Sb	0	most materials
mp-58	K	0	most materials
mp-579560	Cs3Sb2Br9	0	most materials
mp-579544	Ca6Cu2Sn7	0	most materials
mp-579536	CsCu2ICl2	0	most materials
mp-5795	CaMg2N2	0	most materials
mp-579459	NaNi(PO3)3	0	most materials
mp-5794	Zn(GaO2)2	0	most materials
mp-5787	SrCuO2	0	most materials
mp-5784	Na2GeO3	0	most materials
mp-5782	AlAgS2	0	most materials
mp-5769	Li3SbO4	0	most materials
mp-5756	Cu3PSe4	0	most materials
mp-574599	CsAuSe	0	most materials
mp-574498	Cs3Bi2	0	most materials
mp-574485	Cs4Ga2Se5	0	most materials
mp-574379	CsHg2	0	most materials
mp-574086	SiBr4	0	most materials
mp-574040	K2SnBr6	0	most materials
mp-573891	K2Ag4Se3	0	most materials
mp-573763	Cs2Te	0	most materials
mp-573755	CsTeAu	0	most materials
mp-573751	AlTeCl7	0	most materials
mp-573721	Cs2SiAs2	0	most materials
mp-573697	CsCl	0	most materials
mp-573581	Na2TeSe3	0	most materials
mp-573514	CsSb	0	most materials
mp-573373	PICl8	0	most materials
mp-5733	CaSiO3	0	most materials
mp-573204	Cs2KBiF6	0	most materials
mp-573145	CsGa3S5	0	most materials
mp-572951	CsNaSi2O5	0	most materials
mp-572903	CsCu2F5	0	most materials
mp-572892	GeS2	0	most materials
mp-572805	Cs2I4O11	0	most materials
mp-572598	Cs2Ge2S5	0	most materials
mp-572596	TlIn3S5	0	most materials
mp-572526	SbBr(OF3)2	0	most materials
mp-572149	Cs2Al(NO3)5	0	most materials
mp-571623	Al2BiSe4	0	most materials
mp-571617	Sr2LiInGe2	0	most materials
mp-571599	Ba(BiPd)2	0	most materials
mp-571594	K3AgSn3Se8	0	most materials
mp-571582	TlHg3Sb2Br3	0	most materials
mp-571566	Li2ZnSi	0	most materials
mp-571527	Cs2LiInCl6	0	most materials
mp-571486	CuSe	0	most materials
mp-571464	RbPSe3	0	most materials
mp-571461	K4ZnAs2	0	most materials
mp-571453	K2SnCl6	0	most materials
mp-571440	K2CuBr3	0	most materials
mp-571420	Ba(NiP2)2	0	most materials
mp-571333	Ca5(SiN3)2	0	most materials
mp-571306	Ca2Zn2CuP3	0	most materials
mp-571264	Ca5Au4	0	most materials
mp-571260	AlInI4	0	most materials
mp-571222	CsBr	0	most materials
mp-571216	Sr3(AlGe2)2	0	most materials
mp-571164	Rb3AgSn3Se8	0	most materials
mp-571162	Ca3(GaN2)2	0	most materials
mp-571146	SnICl	0	most materials
mp-571103	In5AgSe8	0	most materials
mp-571102	TlI	0	most materials
mp-571085	Ga2BiSe4	0	most materials
mp-571069	Ba3(CdSb2)2	0	most materials
mp-571046	Sr5(GeN3)2	0	most materials
mp-571039	CaAlPd	0	most materials
mp-571015	CuP4Se4I	0	most materials
mp-571011	CsI4	0	most materials
mp-570971	Sr3Ga3N5	0	most materials
mp-570962	SbI3(BrCl3)2	0	most materials
mp-570957	CsSiTe3	0	most materials
mp-570948	LiCaGaN2	0	most materials
mp-570936	K(SnAu)3	0	most materials
mp-570935	LiI	0	most materials
mp-5709	Tl3PO4	0	most materials
mp-570887	K2Ag2SnSe4	0	most materials
mp-570850	LiCa2InGe2	0	most materials
mp-570803	Ba2Ge(TeSe)2	0	most materials
mp-570775	BaAu	0	most materials
mp-570771	BaLi2(MgSi)2	0	most materials
mp-570747	N2	0	most materials
mp-570703	Ca(AlCl4)2	0	most materials
mp-570652	Hg6BiAs4Cl7	0	most materials
mp-570632	ScBi	0	most materials
mp-570609	TlGaCl4	0	most materials
mp-570556	Sr(InAu)2	0	most materials
mp-570536	Rb2AgAu3I8	0	most materials
mp-5704	Tl3AsS4	0	most materials
mp-570370	SnPSe3	0	most materials
mp-570351	Na2Sn3Au	0	most materials
mp-570324	Rb2TeBr6	0	most materials
mp-570321	InSb2Se4Br	0	most materials
mp-570315	PBr2N	0	most materials
mp-570298	Ba(SbAu)2	0	most materials
mp-570245	Ba2GaGeN	0	most materials
mp-570238	P10Au7I	0	most materials
mp-570219	InBr3	0	most materials
mp-570213	LiMgBi	0	most materials
mp-5702	Cu3SbS4	0	most materials
mp-570158	KRb3CdCl6	0	most materials
mp-570136	CuI	0	most materials
mp-570097	Sr(Li2P)2	0	most materials
mp-570084	Hg3AsSe4I	0	most materials
mp-570080	Li2TeSe3	0	most materials
mp-570005	SbBr3	0	most materials
mp-569991	Na15SnGe8P	0	most materials
mp-569952	K2CuCl3	0	most materials
mp-569886	KIn9Ni2	0	most materials
mp-569867	SrP3	0	most materials
mp-569857	K2P3	0	most materials
mp-569834	LiCu2Sn	0	most materials
mp-569813	In5AgTe8	0	most materials
mp-569812	BaN3Cl	0	most materials
mp-569790	BaAg2GeSe4	0	most materials
mp-569779	ScSbPd	0	most materials
mp-569766	TeI	0	most materials
mp-569677	Sr2IN	0	most materials
mp-569675	Tl2Hg2PdCl8	0	most materials
mp-569653	SnPCl9	0	most materials
mp-569639	TlCl	0	most materials
mp-569628	CaCdAu	0	most materials
mp-569617	Ca3Zn2(CuP2)2	0	most materials
mp-569561	TeCl4	0	most materials
mp-569548	CsAuBr3	0	most materials
mp-569512	SbICl8	0	most materials
mp-569501	LiCaBi	0	most materials
mp-569454	CdHgAsBr	0	most materials
mp-569442	RbAuCl4	0	most materials
mp-569435	KBi(PSe3)2	0	most materials
mp-569396	BaLi2(MgGe)2	0	most materials
mp-569267	Ca2CdSb2	0	most materials
mp-569209	SbAsPCl13	0	most materials
mp-569193	Cs4P2Se9	0	most materials
mp-569152	SnCl2	0	most materials
mp-569149	K2TeCl6	0	most materials
mp-569132	K3InCl6	0	most materials
mp-569129	TlCuPSe3	0	most materials
mp-569126	AgBi(PSe3)2	0	most materials
mp-569115	Li2ZnGe	0	most materials
mp-569114	BaAg2SnSe4	0	most materials
mp-569095	Rb3Bi	0	most materials
mp-569060	Cs2PSe5	0	most materials
mp-569028	Rb2SnBr6	0	most materials
mp-569018	Mg3Bi2	0	most materials
mp-568974	Ca(CuSn)2	0	most materials
mp-568968	K2SnHgSe4	0	most materials
mp-568965	CaSiN2	0	most materials
mp-568936	Ag2Se	0	most materials
mp-568916	K6InTe4Cl	0	most materials
mp-568895	BaSbAu	0	most materials
mp-568866	Na6ZnSn2	0	most materials
mp-568855	K2Hg(PSe3)2	0	most materials
mp-568848	GaCl2	0	most materials
mp-568836	Ba3GeI2	0	most materials
mp-568746	Bi2Pd	0	most materials
mp-568744	Ba2Cd3Bi4	0	most materials
mp-568666	RbAuI3	0	most materials
mp-568662	BaCl2	0	most materials
mp-568628	CsHg5Cl11	0	most materials
mp-568584	N2	0	most materials
mp-568560	TlBr	0	most materials
mp-568540	Ag5Hg4P8Cl5	0	most materials
mp-568501	SrCdBi2	0	most materials
mp-568477	Rb2SbBr6	0	most materials
mp-568476	BiPd2Pb	0	most materials
mp-568474	Ba(CuP2)2	0	most materials
mp-568436	Sr7GeN6	0	most materials
mp-568385	SrLiGaN2	0	most materials
mp-568380	Tl5Se3	0	most materials
mp-568284	SrI2	0	most materials
mp-568264	SiSe2	0	most materials
mp-568252	Rb2Hg2PdCl8	0	most materials
mp-568244	TlSn2Br5	0	most materials
mp-568134	Cs2CdI4	0	most materials
mp-568108	InBr2	0	most materials
mp-568052	K2Ga3	0	most materials
mp-568018	RbSb2	0	most materials
mp-5680	Ca(PO3)2	0	most materials
mp-567998	ICl	0	most materials
mp-567967	LiGaI4	0	most materials
mp-567949	Hg3AsSe4Br	0	most materials
mp-567945	SnTePd	0	most materials
mp-567913	CsAuSe3	0	most materials
mp-567907	P3N5	0	most materials
mp-567878	AlTlBr4	0	most materials
mp-567864	TlBi(PSe3)2	0	most materials
mp-567789	InI3	0	most materials
mp-567780	RbSn2Br5	0	most materials
mp-567776	Cs2AgAuCl6	0	most materials
mp-567771	Ba(Si3N4)2	0	most materials
mp-567769	Ca(SiPd)2	0	most materials
mp-567744	SrBr2	0	most materials
mp-567716	AlTlCl4	0	most materials
mp-567714	Rb2AgBr3	0	most materials
mp-567666	Ba3BiN	0	most materials
mp-567644	RbCu2Br3	0	most materials
mp-567629	CsPbBr3	0	most materials
mp-567583	CsSbCl6	0	most materials
mp-567558	CsAgCl2	0	most materials
mp-567556	CdSb2Se3Br2	0	most materials
mp-567515	Rb2Hg2PdBr8	0	most materials
mp-567503	PbI2	0	most materials
mp-567486	BaSr2(PN2)6	0	most materials
mp-567485	CaGaAu3	0	most materials
mp-567414	BiAuCl6	0	most materials
mp-567398	Sr3MgGeN4	0	most materials
mp-567386	Cs2Cd3Te4	0	most materials
mp-567371	Sr3Li4(GeN3)2	0	most materials
mp-567278	Sr(Si3N4)2	0	most materials
mp-567219	Li4Ca3(SiN3)2	0	most materials
mp-567114	Sr(BiPd)2	0	most materials
mp-567084	KNi(PO3)3	0	most materials
mp-567084	KNi(PO3)3	0	most materials
mp-566944	NiBiPO5	0	most materials
mp-566823	KNiAsO4	0	most materials
mp-566823	KNiAsO4	0	most materials
mp-566800	Cs5CaNi4F15	0	most materials
mp-566800	Cs5CaNi4F15	0	most materials
mp-566796	Sr2NiSe2(ClO3)2	0	most materials
mp-566796	Sr2NiSe2(ClO3)2	0	most materials
mp-566733	KNiAs3F18	0	most materials
mp-566733	KNiAs3F18	0	most materials
mp-566629	Li2NiPO4F	0	most materials
mp-566578	Na4Ni5(P3O11)2	0	most materials
mp-566578	Na4Ni5(P3O11)2	0	most materials
mp-566301	As3Pb5ClO12	0	most materials
mp-566008	Li2NiO3	0	most materials
mp-566008	Li2NiO3	0	most materials
mp-565891	Ba2Ni2ClF7	0	most materials
mp-565891	Ba2Ni2ClF7	0	most materials
mp-565699	NaNiAsO4	0	most materials
mp-565622	K2Ni(NO3)4	0	most materials
mp-565521	NiBiAsO5	0	most materials
mp-565521	NiBiAsO5	0	most materials
mp-565426	Na2GaNiF7	0	most materials
mp-565426	Na2GaNiF7	0	most materials
mp-564	TePd	0	most materials
mp-5637	SrZnO2	0	most materials
mp-562920	CsAl(SiO3)2	0	most materials
mp-562569	CsPPbS4	0	most materials
mp-562541	Cs2Na3TlO4	0	most materials
mp-562504	Cs2GaP3O10	0	most materials
mp-5625	Ag2SO4	0	most materials
mp-562442	Cs2SeO4	0	most materials
mp-562441	Cs3AlO3	0	most materials
mp-562345	Cs2Si2O5	0	most materials
mp-562263	Cs2PbO2	0	most materials
mp-562230	Rb3(Cu4S3)2	0	most materials
mp-562102	K2S2O7	0	most materials
mp-562072	Cs3SbO3	0	most materials
mp-561973	K(TeO3)2	0	most materials
mp-561947	CsHgF3	0	most materials
mp-561926	NaNiIO6	0	most materials
mp-561926	NaNiIO6	0	most materials
mp-561902	CsAg3S2	0	most materials
mp-561827	Cs3TlF6	0	most materials
mp-5618	Mg2As2O7	0	most materials
mp-561710	CsSnS3	0	most materials
mp-561664	TeF4	0	most materials
mp-561647	Cs2TeOF4	0	most materials
mp-561639	CsSbS2	0	most materials
mp-561622	Cs2AgAsS4	0	most materials
mp-561620	Ag3AsS3	0	most materials
mp-5616	Sr2P2O7	0	most materials
mp-561549	K2Be2(Si2O5)3	0	most materials
mp-561533	SbOF	0	most materials
mp-561512	K4Cu4Cl10O	0	most materials
mp-561491	KNaMg2Si4(O5F)2	0	most materials
mp-561490	PdSeO4	0	most materials
mp-561480	NaNiF3	0	most materials
mp-561474	K3LiSiO4	0	most materials
mp-561472	Hg2PO3F	0	most materials
mp-561457	CsAlSiO4	0	most materials
mp-561454	KAu(SO4)2	0	most materials
mp-561446	BaCa(GaO2)4	0	most materials
mp-561437	Al2Ge(O2F)2	0	most materials
mp-561424	KAlF4	0	most materials
mp-561407	RbGaS2	0	most materials
mp-561394	SrTeO3	0	most materials
mp-561369	K3Bi2(AsO4)3	0	most materials
mp-561350	AlBiSCl4	0	most materials
mp-561328	SbSe(BrF2)3	0	most materials
mp-561317	Rb2NiF4	0	most materials
mp-561290	K2BiF5	0	most materials
mp-561277	K2PbO3	0	most materials
mp-561268	As3Pb2ClO6	0	most materials
mp-561260	Na2CaP2O7	0	most materials
mp-561254	NaLi3GeO4	0	most materials
mp-561246	Al2Si2Pb2O9	0	most materials
mp-561243	Sr2CuClO2	0	most materials
mp-561236	Pb13(Cl3O5)2	0	most materials
mp-561222	K2HgBr2(NO6)2	0	most materials
mp-561190	NaAu(SO4)2	0	most materials
mp-561185	Cs2Sn2Hg3S8	0	most materials
mp-561179	Ba2CuIO2	0	most materials
mp-561176	Sb2POF13	0	most materials
mp-561132	K2Ge2PbS6	0	most materials
mp-561125	Ba5P3BrO12	0	most materials
mp-561110	SiPb4(ClO)4	0	most materials
mp-561104	Ga(IO3)3	0	most materials
mp-561083	Na3Bi(PO4)2	0	most materials
mp-561075	Na2CdSnS4	0	most materials
mp-561062	NaSb3(PO5)2	0	most materials
mp-561058	Na3Ga(PO4)2	0	most materials
mp-561051	Rb2Sb4S7	0	most materials
mp-561005	SrBi6(PO5)4	0	most materials
mp-560976	KNiF3	0	most materials
mp-560950	K2NaTlO3	0	most materials
mp-560944	Cs4Ba(PO3)6	0	most materials
mp-560937	Na3Si3SnO9F	0	most materials
mp-560934	Na2Zn5(PO4)4	0	most materials
mp-560921	NaAlAs2O7	0	most materials
mp-560904	CdHg2SO6	0	most materials
mp-560901	PdSCl	0	most materials
mp-560891	SnP2Cl8O3	0	most materials
mp-560889	Ba6Na2Si4O15	0	most materials
mp-560851	CsIOF4	0	most materials
mp-560831	Na6P4Pb3S16	0	most materials
mp-560790	Cs2NaBiF6	0	most materials
mp-560789	SbI(ClF3)2	0	most materials
mp-560745	AuN5O14	0	most materials
mp-560742	Ba2TeP2O9	0	most materials
mp-560739	K3Li3TeO6	0	most materials
mp-560721	NaCaBeSi2O6F	0	most materials
mp-560715	Sn5(PO5)2	0	most materials
mp-560685	K2Ge(IO3)6	0	most materials
mp-560675	K6Si2CuO8	0	most materials
mp-560670	MgSeO4	0	most materials
mp-560658	Na5Bi2As5O18	0	most materials
mp-560656	CaTeO3	0	most materials
mp-560653	RbNaLi6(SiO4)2	0	most materials
mp-560647	Ca2GeO4	0	most materials
mp-560642	Na3SbP2O9	0	most materials
mp-560633	Al2SnCl6O	0	most materials
mp-560632	NaGaSiO4	0	most materials
mp-560629	K3Al2(PO4)3	0	most materials
mp-560626	Ba2Ni7F18	0	most materials
mp-560626	Ba2Ni7F18	0	most materials
mp-560613	Na2TeO4	0	most materials
mp-560601	K2CuS(ClO2)2	0	most materials
mp-560597	Na8Si6SnO18	0	most materials
mp-560595	Ca2AsClO4	0	most materials
mp-560587	Rb2Sb8O13	0	most materials
mp-560578	RbTeNO3F4	0	most materials
mp-560570	Rb2NaAl6F21	0	most materials
mp-560560	CdSiO3	0	most materials
mp-560558	CsCdAuS2	0	most materials
mp-560555	Li8Bi2PdO10	0	most materials
mp-560549	AuSeClO3	0	most materials
mp-560544	Ba3Zn5In2O11	0	most materials
mp-560538	Na3AlS3	0	most materials
mp-560535	K4Sr(SiO3)3	0	most materials
mp-560459	Rb3Al2(PO4)3	0	most materials
mp-560449	K3Ni2F7	0	most materials
mp-560443	AgHg2NO5	0	most materials
mp-560441	BaZn2Si2O7	0	most materials
mp-560420	K3Bi2(PO4)3	0	most materials
mp-560398	K2Zn(GeO3)2	0	most materials
mp-560394	AsPbClO2	0	most materials
mp-560387	Cs2Al2P2O9	0	most materials
mp-560370	Ge(PbS2)2	0	most materials
mp-560354	SbCl(OF3)2	0	most materials
mp-560334	NaAlSiO4	0	most materials
mp-560324	Rb3Hg2S3ClO12	0	most materials
mp-560320	KBa2(PO3)5	0	most materials
mp-560310	SbPOF8	0	most materials
mp-560240	K2SbPO6	0	most materials
mp-560222	Na3SO4F	0	most materials
mp-560216	Cs2GeP4O13	0	most materials
mp-560193	SnSe2(Cl4O)2	0	most materials
mp-560176	K2NaAl3F12	0	most materials
mp-560174	NaZn(PO3)3	0	most materials
mp-560163	Ca4Si2O7F2	0	most materials
mp-560120	Na2Pd(NO3)4	0	most materials
mp-560067	AgHgSBr	0	most materials
mp-560051	RbSiBiS4	0	most materials
mp-560037	Rb2NaBiF6	0	most materials
mp-560023	NiSnF6	0	most materials
mp-560023	NiSnF6	0	most materials
mp-560021	AuS3(O3F)3	0	most materials
mp-560008	PNF2	0	most materials
mp-559985	CaP4O11	0	most materials
mp-559965	Sr5As3ClO12	0	most materials
mp-559961	Tl2SeO4	0	most materials
mp-559939	Ba(PO3)2	0	most materials
mp-559932	KTeOF3	0	most materials
mp-559904	NaLi3SiO4	0	most materials
mp-559894	Sb2Te2O9	0	most materials
mp-559893	LiBi(PdO2)2	0	most materials
mp-559875	K3Na2LiTeO6	0	most materials
mp-559864	InSb2S4Br	0	most materials
mp-559847	Ag5P(S2Cl)2	0	most materials
mp-559824	Au2Se3O10	0	most materials
mp-559817	Na3(CuO2)2	0	most materials
mp-559814	Li5SbS3I2	0	most materials
mp-559798	NiF2	0	most materials
mp-559795	Rb7NaZn2O6	0	most materials
mp-559786	NaAs4BrO6	0	most materials
mp-559777	Na5Ca2Al(PO4)4	0	most materials
mp-559760	ScIO	0	most materials
mp-559710	NaInAs2O7	0	most materials
mp-559695	Cs2RbBiF6	0	most materials
mp-559663	SrLiNiF6	0	most materials
mp-559633	Cu6PbO8	0	most materials
mp-559613	K6Se2O9	0	most materials
mp-559610	Rb2NaAl2(PO4)3	0	most materials
mp-559602	AgSb(S8F3)2	0	most materials
mp-559584	LiCaNiF6	0	most materials
mp-559540	RbZnSClO4	0	most materials
mp-559537	Ca4P6O19	0	most materials
mp-559452	Na5Li(PO4)2	0	most materials
mp-559446	NaPPdS4	0	most materials
mp-559408	NiPbF6	0	most materials
mp-5594	Sc2Si2O7	0	most materials
mp-559379	SbTeClO3	0	most materials
mp-559377	IOF3	0	most materials
mp-559376	Na2CaPO4F	0	most materials
mp-559352	Ba4Na(BiO4)3	0	most materials
mp-559319	Zn2P2O7	0	most materials
mp-559309	K3ZnNCl4O3	0	most materials
mp-559270	RbBa4Sb3O	0	most materials
mp-559257	AgTeO3	0	most materials
mp-559227	RbGeBiS4	0	most materials
mp-559224	Sr3Al2Cl2O5	0	most materials
mp-559213	CsIn3O5	0	most materials
mp-559203	CdSeO3	0	most materials
mp-559200	Cd(InS2)2	0	most materials
mp-559184	Zn2Si3Pb4SO15	0	most materials
mp-559141	Ba5Cu4ClF17	0	most materials
mp-559093	Tl2BiP2S7	0	most materials
mp-559071	Ag2Bi2S3Cl2	0	most materials
mp-559068	Na2Pd(SeO4)2	0	most materials
mp-559067	KNa2AuO2	0	most materials
mp-559065	NaI3O8	0	most materials
mp-559062	KP(OF)2	0	most materials
mp-559020	KBi(PO3)4	0	most materials
mp-559000	SbSe6IF6	0	most materials
mp-558990	K2Sr(PO3)4	0	most materials
mp-558988	Ni(NF7)2	0	most materials
mp-558988	Ni(NF7)2	0	most materials
mp-558984	GaTeO3F	0	most materials
mp-558938	Zn4SiTePbO10	0	most materials
mp-558930	Zn(PO3)2	0	most materials
mp-558924	Na5Ga3F14	0	most materials
mp-558862	NaGe4(PO4)3	0	most materials
mp-558861	KI(OF)2	0	most materials
mp-558807	ZnAgPS4	0	most materials
mp-5588	BaSiF6	0	most materials
mp-558798	BiPO4	0	most materials
mp-558751	Ca(BiO2)2	0	most materials
mp-558731	Li2TeS3	0	most materials
mp-558706	RbGa3S5	0	most materials
mp-5587	Ba2ZnS3	0	most materials
mp-558692	Sb2ClO2F11	0	most materials
mp-558660	Mg2BiPO6	0	most materials
mp-558645	PBr3O	0	most materials
mp-558629	Ba2ZnSi2O7	0	most materials
mp-558616	SrZnP2O7	0	most materials
mp-558603	K2Si4O9	0	most materials
mp-558592	Sb8Br2O11	0	most materials
mp-558571	Sc2Te5O13	0	most materials
mp-558568	Rb2CdSiO4	0	most materials
mp-558523	PAuClF3	0	most materials
mp-558500	K2Ag2GeS4	0	most materials
mp-558483	K4LiIO6	0	most materials
mp-558480	K2P2O5F2	0	most materials
mp-558466	AsS(BrF2)3	0	most materials
mp-558458	Mg3Si(O2F)2	0	most materials
mp-558456	Hg3Se4O5	0	most materials
mp-558427	Na6Mg(SO4)4	0	most materials
mp-558387	TeOF2	0	most materials
mp-558362	CaMgGeO4	0	most materials
mp-558360	AlAs3S5Cl4	0	most materials
mp-558350	Zn2TeBr2O3	0	most materials
mp-558349	Ba5P3ClO12	0	most materials
mp-558332	K5Au(IO)2	0	most materials
mp-558330	IClOF	0	most materials
mp-558310	BaLi2SiO4	0	most materials
mp-558309	K4SnSb2F14	0	most materials
mp-558298	Zn3TeAs2Pb3O14	0	most materials
mp-558268	Ca4Si6Pb6Cl2O21	0	most materials
mp-558244	As(IF3)2	0	most materials
mp-558243	Ba2InClO3	0	most materials
mp-558240	K3Al4P2O8F9	0	most materials
mp-558237	NaZnPO4	0	most materials
mp-558208	RbInAs2O7	0	most materials
mp-558198	Na2Cd(SO4)2	0	most materials
mp-558188	AgHg2AsO4	0	most materials
mp-558168	Ba(AuF6)2	0	most materials
mp-558162	RbP(OF)2	0	most materials
mp-558151	Ag2PO3F	0	most materials
mp-558142	Cs4Ni3F10	0	most materials
mp-558102	KLiSi2O5	0	most materials
mp-558085	KNaGeO3	0	most materials
mp-558045	NaLi2PO4	0	most materials
mp-558026	SbSe(IF2)3	0	most materials
mp-558023	Rb2Sb4O11	0	most materials
mp-557997	CaSeO3	0	most materials
mp-557993	BiO2	0	most materials
mp-557992	InTeClO3	0	most materials
mp-557952	RbInP2O7	0	most materials
mp-557920	Zn3(PO4)2	0	most materials
mp-557918	KGaAs2O7	0	most materials
mp-557874	KAg(PO3)2	0	most materials
mp-557871	CuAsPbO4	0	most materials
mp-557832	K2Cd(AuS)4	0	most materials
mp-557809	SbSCl9	0	most materials
mp-557807	CsK2AuO2	0	most materials
mp-557802	K2Be(Si2O5)2	0	most materials
mp-557777	K2ScSi4O10F	0	most materials
mp-557773	Sc2TeO6	0	most materials
mp-557772	CsNiF3	0	most materials
mp-557772	CsNiF3	0	most materials
mp-557761	KBa4Sb3O	0	most materials
mp-557753	K3PO4	0	most materials
mp-557747	K2SrP2O7	0	most materials
mp-557746	Zn2SeCl2O3	0	most materials
mp-557737	Al2BiS4	0	most materials
mp-557733	KNiIO6	0	most materials
mp-557733	KNiIO6	0	most materials
mp-557728	KCu4AsS4	0	most materials
mp-557715	Cd(AuF6)2	0	most materials
mp-557698	K4Na2TeO6	0	most materials
mp-557664	Cs2TlBiF6	0	most materials
mp-557662	Ca2Mg5Si8(O11F)2	0	most materials
mp-557656	RbNaSi2O5	0	most materials
mp-557650	Sr3P6(N4O3)2	0	most materials
mp-557637	Hg2SeO3	0	most materials
mp-557628	AsS(IF3)2	0	most materials
mp-557618	Rb4Si2CuO7	0	most materials
mp-557599	Rb2Bi(ClO4)5	0	most materials
mp-557589	TlZn(PO3)3	0	most materials
mp-557584	K4Ba(GeO3)3	0	most materials
mp-557583	TlInAs2O7	0	most materials
mp-557577	K3ScSi2O7	0	most materials
[truncated: 3,432 more rows]
